## REVIEW

# Potential effects of age-associated oxidative stress on mammalian oocytes/embryos

Juan J.Tarín<sup>1</sup>

Department of Paediatrics, Obstetrics and Gynaecology, Faculty of Medicine, University of Valencia, Spain and Department of Molecular, Cellular, and Developmental Biology, University of Colorado at Boulder, Porter Biosciences Building, Campus Box 347, Boulder, Colorado 80309–0347, USA

<sup>1</sup>To whom correspondence should be addressed at: Department of Paediatrics, Obstetrics and Gynaecology, Faculty of Medicine, University of Valencia, Spain

**This bioessay aims to explain the different effects of maternal ageing and postovulatory oocyte ageing on mammalian oocytes/embryos under the scope of 'the oxygen radical-mitochondrial injury hypothesis of ageing'. This hypothesis assumes a key role in the senescent process of oxygen radical damage to mitochondrial DNA, proteins and lipids. It is proposed that a decrease in intracellular ATP concentrations and glutathione (GSH)/glutathione disulphide (GSSG) ratio together with a concomitant increase in cytosolic Ca<sup>2+</sup> are major factors causing the observed detrimental effects of ageing on cytoskeletal fibres, fertilization and embryo development.**

**Key words:** ageing/embryo development/fertilization/mitochondria/oxidative stress

## Introduction

During this century a huge number (more than 300) of theories of ageing have been put forward. This is not surprising if we take into account the fact that in nature ageing exists in many diverse forms and variations making it impossible to postulate a common cause of ageing. For instance, mechanisms of ageing might be different for plants and animals, invertebrates and vertebrates. In addition, organs, tissues and differentiated cells usually have very different patterns of age change and different rates of ageing (for review, see Medvedev, 1990). Although it is doubtful that a single theory can explain all the mechanisms of ageing, there is general consensus that, at least in mammals, an increased accumulation of intracellular oxidative damage with time may play an important role in the process of ageing.

The free radical theory of ageing (Harman, 1956) highlights peroxidative damage to nuclear DNA or cell membranes as the main mechanism for the decay of cellular function with age. This hypothesis, however, has been subsequently modified to assign the key role in the senescent process to oxygen radical damage to mitochondria (Miquel *et al.*, 1980; Miquel and Fleming, 1986; Shigenaga *et al.*, 1994). According to this view, reactive oxygen species (ROS) such as superoxide anion (O<sup>2-</sup>), hydrogen peroxide (H<sub>2</sub>O<sub>2</sub>) and the highly toxic hydroxyl free radical (OH<sup>•</sup>) are produced continuously in mitochondria because of the 'leakage' of high energy electrons along the electron transport chain. Although mitochondrial proteins and lipids can be damaged, mitochondrial DNA (mtDNA) is a major target for oxidative attack because of its location near the inner mitochondrial membrane sites where oxidants are formed, as well as its lack of both protective histones and of

DNA repair activity (for review, see Shigenaga *et al.*, 1994). Accumulated oxidative damage to mtDNA, proteins and lipids may result in mutation, inactivation or loss of mtDNA, synthesis of abnormal proteins, accumulation of oxidized dysfunctional proteins and changes in membrane lipid composition. All these effects may inhibit mitochondrial replication, reduce the efficiency of the electron transport chain, increase the likelihood of ROS formation, inactivate key metabolic enzymes and increase membrane permeability, resulting in a reduction in the number of functionally-intact mitochondria and hence in ATP concentrations (for reviews see Miquel and Fleming, 1986; Shigenaga *et al.*, 1994). The increased production of ROS by defective mitochondria may decrease intracellular glutathione (GSH)/glutathione disulphide (GSSG) ratio. This, in turn, may cause impairment of Ca<sup>2+</sup> transport and subsequent perturbation of intracellular Ca<sup>2+</sup> homeostasis, resulting in a sustained increase in cytosolic Ca<sup>2+</sup> concentration (Beatrice *et al.*, 1984) (for review, see Orrenius *et al.*, 1992).

Accumulation of oxygen radical damage to mitochondria may be especially patent in post-mitotic differentiated cells such as neurons. Although rates of repair may be low in post-mitotic cells, fast-replicating cells such as spermatogonia age more slowly because renewal of macromolecules in each cellular cycle may aid organelle protection (Miquel *et al.*, 1978). Endometrial stem cells also appear to age more slowly than post-mitotic cells. They retain the potential to reorganize and regenerate an entire functional endometrium until at least the sixth decade if they are stimulated to divide with appropriate hormonal replacement therapy (Antinori *et al.*, 1995). However, primary oocytes surrounded by a single squamous layer of pregranulosa cells (primordial follicles) are arrested at the

diplotene stage of the first meiotic prophase from fetal stages, or soon after birth, until stimulated to grow and resume meiosis at the periovulation time. During this 'resting' period, which in women may last  $\geq 45$  years, oxidative stress may be generated in oocytes and/or surrounding ovarian cells and cause a decrease in oocyte/embryo viability with the resulting reduction in pregnancy rates as well as increase in spontaneous abortion rates (for reviews on effects of maternal ageing on reproductive function see Meldrum, 1993; Vom Saal *et al.*, 1994; Yaron *et al.*, 1994). It is important to state at this point that the term 'resting' refers only to meiotic inactivity since 'quiescent' oocytes appear to be metabolically active. They apparently synthesize RNAs such as epidermal growth factor (EGF) (Singh *et al.*, 1995) and cholinesterase (Malingier *et al.*, 1989) mRNAs as well as proteins such as EGF (Singh *et al.*, 1995) and the rabbit 55 kDa zona pellucida protein (Lee and Dubar, 1993).

Recently, it has been shown that oocytes from older women ( $\geq 38$  years of age) are 3.3 times more likely to contain the 5 kb 'common' mtDNA deletion than oocytes from younger women (Keefe *et al.*, 1995). In addition, preliminary data show that oocytes from aged (40–48 week old) mice do indeed suffer oxidative stress. They exhibit lower GSH concentration and decreased GSH/GSSG ratio when compared to oocytes from young (8–12 week old) and prepubertal (21–25 day old) mice (J.J.Tarín, J.Sastre, F.J.Vendrell *et al.*, unpublished). Boerjan and de Boer (1990) also reported that ageing of mouse oocytes *in vivo* is associated with decreased cytoplasmic concentration of total glutathione (GSH plus GSSG), suggesting a concomitant decline in GSH/GSSG ratio.

In the first part of this bioessay, I review the effects of both maternal ageing and postovulatory oocyte ageing on cytoskeleton, organelle distribution, fertilization, and development *in vitro* and *in vivo* of mammalian oocytes/embryos. Then, I propose mechanisms by which these effects are produced. My point of view is framed within the 'oxygen radical–mitochondrial injury hypothesis of ageing'.

### Effects of maternal and oocyte ageing on mammalian oocytes/embryos

The main effects of maternal and oocyte ageing on mammalian oocytes embryos are shown in Table I. In humans, maternal ageing does not appear to affect cleavage rate and embryo morphology (Feldberg *et al.*, 1990; Yaron *et al.*, 1993). Reduced cleavage rates of embryos from middle-aged women may be overlooked because of the low frequency of observations made (at best, once a day) as well as the short-term culture period (usually until the 4–8-cell stage) employed before transfer or cryopreservation. This short period of embryo culture precludes cell counting at the morula and blastocyst stages, points of embryo development *in vitro* where differences in cleavage rates between groups would be maximum. On the other hand, a lack of effect of maternal age on embryo morphology may be explained by the short-term culture period, the rather subjective methods for classification of embryo morphology utilized in in-vitro fertilization (IVF) centres, and the high degree of cellular fragmentation that characterizes human

embryo development *in vitro*. All these factors may conceal subtle or even gross morphological differences between embryos from young and middle-aged women.

Unfortunately, there is a limited number of studies analysing the ultrastructure of oocytes from middle-aged females. In the rat, maternal age is associated with an increased proportion of germinal vesicle oocytes exhibiting undulations in the nuclear membrane. The nucleoplasm appears more dense and the nuclear membrane thicker than in control oocytes. The stacking arrangement of 'sheets' of intermediate filaments typical of mammalian oocytes (Gallicano *et al.*, 1994) deteriorates, with only small single filaments remaining. The number of cortical granules is decreased. The microvilli are shorter and their frequency along the plasma membrane is reduced. Furthermore, the fibre network of the zona pellucida is arranged into continuous bands and the cytoplasmic projections of the cumulus cells which penetrate the zona pellucida are retracted (Peluso *et al.*, 1980).

Data on the effects of post-ovulatory ageing of human oocytes on embryo development *in vitro* and *in vivo* are contradictory. Whereas some studies report no effect of oocyte ageing on cleavage rate and/or embryo morphology after intracytoplasmic sperm injection (ICSI) (Nagy *et al.*, 1993; Tsigotis *et al.*, 1995) or subzonal insemination (SUZI) (Wiker *et al.*, 1993; Imoedemhe and Sigue, 1994), others show increased fragmentation following conventional IVF methods (Imoedemhe and Sigue, 1994). Likewise, although most authors point out that aged oocytes have a reduced potential for implantation and development *in vivo* (Chen *et al.*, 1995) (for review, see Winston *et al.*, 1993), others claim that high pregnancy rates can be achieved after reinsemination of aged oocytes following conventional IVF (Ashkenazi *et al.*, 1990; Pool *et al.*, 1990) or assisted fertilization (Wiker *et al.*, 1993; Imoedemhe and Sigue, 1994). Discrepancies among studies may be explained by differences in maturation status of oocytes at insemination (Winston *et al.*, 1993); sperm source used for reinsemination (fresh versus aged spermatozoa and husband's versus donor's spermatozoa); and criteria used for allocating inseminated–unfertilized oocytes to conventional IVF or assisted fertilization techniques.

### Potential effects of age-associated oxidative stress on oocytes/embryos

#### Cytoskeletal fibres

As mentioned above, oxygen radical damage to mitochondrial DNA, proteins and lipids is associated with decreased intracellular ATP levels, drop in GSH/GSSG ratio and increased cytosolic  $\text{Ca}^{2+}$ . Each of these parameters acting separately or together may affect the dynamic equilibrium of microtubules (assembly–disassembly of tubulins) and/or microfilaments (assembly–disassembly of actin) and so induce the aforementioned cytoskeletal alterations observed in aged oocytes/embryos (Tarín, 1995). Among these cytoskeletal alterations, the increased frequency of aneuploidy, inhibition of extrusion of the first polar body, and increased incidence of cellular fragmentation and gross abnormal morphology are of particular

Table I. Effects of maternal and oocyte ageing on mammalian oocytes/embryos

| Effect                                                                                                                                                       | Maternal ageing                                             | Oocyte ageing                |
|--------------------------------------------------------------------------------------------------------------------------------------------------------------|-------------------------------------------------------------|------------------------------|
| Aggregates of tubuli of smooth endoplasmic reticulum                                                                                                         | –                                                           | Yes <sup>1</sup>             |
| Aggregates of small mitochondria-vesicle complexes                                                                                                           | –                                                           | Yes <sup>2</sup>             |
| Loss of actin microfilaments beneath the plasma membrane                                                                                                     | –                                                           | Yes <sup>3,4</sup>           |
| Structural alteration of microvillar extensions of the plasma membrane from a long slender profile to a short and bulbous or club-shaped appearance          | –                                                           | Yes <sup>1</sup>             |
| Reduction of pole-to-pole distance of the MII spindle                                                                                                        | Yes <sup>5</sup>                                            | –                            |
| Disruption, structural alterations and centripetal migration of the spindle                                                                                  | –                                                           | Yes <sup>3-4, 6-7</sup>      |
| Scattering, decondensation of chromosomes and formation of a single chromatid mass (restitution nucleus) in which individual chromosomes are not discernible | –                                                           | Yes <sup>6-8</sup>           |
| Chromosome fragmentation                                                                                                                                     | Yes <sup>9</sup>                                            | Yes <sup>10</sup>            |
| Shorten the duration of prophase I                                                                                                                           | Yes <sup>11</sup>                                           | –                            |
| C-meiosis                                                                                                                                                    | Yes <sup>5</sup>                                            | –                            |
| Aneuploidy                                                                                                                                                   | Yes <sup>12-14</sup>                                        | No <sup>15-17</sup>          |
| Non-extrusion of the first polar body                                                                                                                        | Yes <sup>18-19</sup>                                        | –                            |
| Non-extrusion of the second polar body                                                                                                                       | –                                                           | Yes <sup>3, 15-16</sup>      |
| Polyspermy                                                                                                                                                   | Yes <sup>20-21</sup>                                        | Yes <sup>17, 22-23</sup>     |
| Cytoplasmic fragmentation                                                                                                                                    | Yes <sup>24-27</sup>                                        | Yes <sup>28</sup>            |
| Spontaneous parthenogenetic activation                                                                                                                       | –                                                           | Yes <sup>29-30</sup>         |
| Centripetal migration and/or spontaneous release of cortical granules into the perivitelline space                                                           | –                                                           | Yes <sup>31-33</sup>         |
| Structural alteration and hardening of the zona pellucida                                                                                                    | Yes <sup>34-36</sup>                                        | Yes <sup>31, 34, 37-39</sup> |
| Alteration in the carbohydrate composition of the plasma membrane                                                                                            | –                                                           | Yes <sup>37</sup>            |
| Increased uptake of leucine                                                                                                                                  | –                                                           | Yes <sup>40</sup>            |
| Rise in acid phosphatase positive organelles (lysosomes)                                                                                                     | –                                                           | Yes <sup>28</sup>            |
| Changes in the electrophoretic pattern of synthesized proteins                                                                                               | –                                                           | Yes <sup>41-42</sup>         |
| Decreased fertilization                                                                                                                                      | Yes <sup>20, 27, 43-45</sup><br>No <sup>21, 26, 46-48</sup> | Yes <sup>49-51</sup><br>–    |
| Shortening of the duration of the first cell cycle                                                                                                           | –                                                           | Yes <sup>52-53</sup>         |
| Inhibition of full pronuclear development                                                                                                                    | –                                                           | Yes <sup>50, 54-55</sup>     |
| Formation of multiple small-sized pronuclei                                                                                                                  | –                                                           | Yes <sup>56-57</sup>         |
| Abnormal development of embryos                                                                                                                              | Yes <sup>24-27</sup>                                        | Yes <sup>49-51</sup>         |
| Increased embryonic mortality                                                                                                                                | Yes <sup>58-60</sup>                                        | Yes <sup>49-51</sup>         |

<sup>1</sup>Longo, 1974; <sup>2</sup>Sundstrom *et al.*, 1985; <sup>3</sup>Webb *et al.*, 1986; <sup>4</sup>Pickering *et al.*, 1988; <sup>5</sup>Eichenlaub-Ritter *et al.*, 1988a; <sup>6</sup>Eichenlaub-Ritter *et al.*, 1988b; <sup>7</sup>Van Wissen *et al.*, 1991; <sup>8</sup>Szollasi, 1971; <sup>9</sup>Tarin *et al.*, 1990; <sup>10</sup>Zenzes and Casper, 1992; <sup>11</sup>Eichenlaub-Ritter and Boll, 1989; <sup>12</sup>Plachot *et al.*, 1988; <sup>13</sup>Munné *et al.*, 1995; <sup>14</sup>see Estop (1989) for review; <sup>15</sup>O'Neill and Kaufman, 1988; <sup>16</sup>Zackowski and Martin-Deleon, 1988; <sup>17</sup>Badenas *et al.*, 1989; <sup>18</sup>Peluso *et al.*, 1980; <sup>19</sup>Roberts and O'Neill, 1995; <sup>20</sup>Page *et al.*, 1983; <sup>21</sup>Feldberg *et al.*, 1990; <sup>22</sup>Ben-Rafael *et al.*, 1986; <sup>23</sup>Pool *et al.*, 1990; <sup>24</sup>Parkening and Soderwall, 1973; <sup>25</sup>Matt *et al.*, 1987; <sup>26</sup>Day *et al.*, 1989; 1991; <sup>27</sup>Brinsko *et al.*, 1994; <sup>28</sup>Longo, 1980; <sup>29</sup>Edirisinghe *et al.*, 1986; <sup>30</sup>Bergere *et al.*, 1992; <sup>31</sup>Dodson *et al.*, 1989; <sup>32</sup>Ducibella *et al.*, 1990; <sup>33</sup>see Gulyas (1980) for review; <sup>34</sup>Nogués *et al.*, 1988; <sup>35</sup>Cohen *et al.*, 1992; <sup>36</sup>Stein *et al.*, 1995; <sup>37</sup>Longo, 1981; <sup>38</sup>Gianfortoni and Gulyas, 1985; <sup>39</sup>Fukuda *et al.*, 1992; <sup>40</sup>Carroll and Longo, 1981; <sup>41</sup>Golbus and Stein, 1976; <sup>42</sup>Van Blerkom, 1979; <sup>43</sup>Català *et al.*, 1988; <sup>44</sup>Ball *et al.*, 1989; <sup>45</sup>Yie *et al.*, 1996; <sup>46</sup>Parkening and Chang, 1976; <sup>47</sup>Eppig and O'Brien, 1995; <sup>48</sup>Sharma *et al.*, 1988; <sup>49</sup>see Lanman (1968) for review; <sup>50</sup>see Smith and Lodge (1987) for review; <sup>51</sup>see Winston *et al.* (1993) for review; <sup>52</sup>Fraser, 1979; <sup>53</sup>Boerjan and de Boer, 1990; <sup>54</sup>Tesarik, 1989; <sup>55</sup>Boerjan and Saris, 1991; <sup>56</sup>Nagy *et al.*, 1993; <sup>57</sup>Tesarik, 1993; <sup>58</sup>see Meldrum (1993) for review; <sup>59</sup>see Vom Saal *et al.* (1994) for review; <sup>60</sup>see Yaron *et al.* (1994) for review.

concern, especially for those peri-menopausal women planning pregnancies.

It is known that cellular ATP deprivation caused by inhibitors of energy metabolism induces a gradual breakdown of actin-containing microfilament bundles (Bershadsky *et al.*, 1980; Svitkina *et al.*, 1986). Such an effect is accompanied by reduction of monomeric (G) actin and concomitant increase in polymeric or filamentous (F) actin from a detergent-soluble or labile pool (Hinshaw *et al.*, 1993). Interestingly, cytochalasin also shortens actin microfilaments and accelerates the polymerization of actin (for review, see Tait and Frieden, 1982). However, the cytoplasmic microtubule network appears to be unaffected by intracellular ATP deprivation caused by prolonged incubation of cells with metabolic inhibitors (e.g. sodium azide, oligomycin, uncouplers) (for review, see Bershadsky and Gelfand, 1983). This is not the case when intracellular GSH is oxidized to GSSG or values of cytosolic Ca<sup>2+</sup> increase. Both oxidation of GSH to GSSG and an increase in calcium prevent polymerization of tubulin and cause rapid depolymerization of preformed microtubules *in vitro*

(Kirschner and Williams, 1974; Berkowitz and Wolff, 1981; Schliwa *et al.*, 1981) and *in vivo* (Kiehart, 1981; Keith *et al.*, 1983; Hori *et al.*, 1993) (for a review on effects of GSH/GSSG ratio on cytoplasmic microtubules *in vitro* and *in vivo*, see Kosower and Kosower, 1978). Oxidation of GSH to GSSG in diamide-treated cells is associated also with fragmentation and shortening of microfilaments together with an increase in actin polymerization (Hinshaw *et al.*, 1991; Rokutan *et al.*, 1994). Likewise, it has been proposed that increased amounts of Ca<sup>2+</sup> are involved in alterations of actin microfilaments and actin-binding proteins associated with formation of surface blebs during oxidative cell injury (for review, see Orrenius *et al.*, 1992).

## Fertilization

Mammalian oocytes and spermatozoa undergo a gradual although opposite change in their intracellular and plasma membrane redox state as they experience nuclear and/or cytoplasmic maturation. Oocytes exhibit a decrease in their

intracellular GSSG concentration and an increase in their intracellular GSH concentration and GSH/GSSG ratio as they progress from germinal vesicle to metaphase II stage (J.J.Tarín, J.Sastre, F.J.Vendrell *et al.*, unpublished data). On the other hand, spermatozoa enter an oxidative state during epididymal maturation by generating disulphide (-S-S-) cross-linkings in nuclear protamines and proteins of the perinuclear matrix, outer membrane of mitochondria, plasma membrane and tail organelles including the outer dense fibre and the fibrous sheath of the principal piece (Bedford *et al.*, 1973; Reyes *et al.*, 1976; Shalgi *et al.*, 1989) (for review, see Yanagimachi 1994).

Fertilization, therefore, may be inhibited by any factor capable of preventing or counteracting these opposing redox changes in oocytes and spermatozoa. For instance, treatment of guinea pig spermatozoa with the disulphide-reducing agent dithiothreitol inhibits capacitation, acrosome reaction and binding to the zona pellucida and oocyte plasma membrane (Yanagimachi *et al.*, 1983). Age-associated oxidative stress of oocytes may inhibit fertilization by counteracting the reducing potential of oocytes. In particular, oxidative damage to cytoskeletal fibres may cause deterioration of the machinery involved in cortical granule (CG) exocytosis. It may either induce spontaneous release of CG with the resulting changes in the zona pellucida glycoproteins ZP2 and ZP3 (sperm penetration would be prevented), or inhibit or delay CG release after entry of the fertilizing spermatozoon into the oocyte (polyspermy would be promoted).

Peroxidative damage to lipids of the plasma membrane may change lipid composition (Choe *et al.*, 1995) (for review, see Shigenaga *et al.*, 1994) decreasing the fluidity and elasticity of the membrane (sperm–oocyte plasma membrane fusion would be hampered). Lipid peroxidation of oocyte plasma membrane may have a role in triggering the plasma membrane polyspermy block after entry of an ‘oxidizing’ spermatozoon into an oocyte. It may also explain the fact that aged hamster and rabbit oocytes expel intact CG enclosed within cytoplasmic blebs (for review, see Gulyas, 1980). According to the present model, lipid peroxidation of both CG and plasma membranes may hinder fusion of CG with the plasma membrane; CG contents would not be released into the perivitelline space and zona reaction would not take place (polyspermy would be promoted).

A reduction in the intracellular GSH/GSSG ratio may deprive the oocyte of sufficient reducing power to be able to decondense the sperm nucleus (Perreault *et al.*, 1984, Calvin *et al.*, 1986). It may also induce spontaneous  $\text{Ca}^{2+}$  release from internal stores by oxidizing sulphhydryl (SH) groups in the permeability transition pore (Beatrice *et al.*, 1984) (for review, see Orrenius *et al.*, 1992). The increased cytosolic  $\text{Ca}^{2+}$  concentration may not only cause spontaneous parthenogenetic activation of aged oocytes but may also interfere with the mechanism triggering oocyte activation at fertilization. Oxidation of GSH to GSSG may also inhibit synthesis of proteins and other macromolecules including RNA and DNA (for review, see Kosower and Kosower, 1978). This may prevent full pronuclear development. Finally, oxidative damage to cytoskeletal fibres may hinder the extrusion of the second polar body and cause dispersion of chromosomes into smaller

groups with the resulting formation of multiple small-sized pronuclei.

### Cleavage rate and/or arrest in embryo development

A reduction in oocyte/embryo ATP contents with age may inhibit protein synthesis and cellular functions including mitosis, compaction, blastocoel formation and hatching, and so delay and/or arrest embryo development. In fact, in the mouse there is a positive correlation between the amount of ATP in oocytes/embryos and the proportion of those oocytes/embryos reaching the blastocyst stage (Quinn and Wales, 1973) as well as the proportion reaching the expanded and hatched blastocyst stage (Van Blerkom *et al.*, 1995). Furthermore, in humans an association between ATP content of oocytes and later embryo potential for implantation and/or development *in vivo* has been reported (Van Blerkom *et al.*, 1995). In that study, it was found that most of the non-inseminated–unfertilized oocytes from patients who conceived had ATP concentrations in the 2.2–2.6 pmol range. In contrast, the ATP concentrations of the majority of the oocytes from women who did not become pregnant was in the 1.4–1.7 pmol range, with none >2.0 pmol. In the mouse, ATP deprivation appears to increase the incidence of embryos arrested at pre-compaction stages. However, cleavage rate of early human embryos does not appear to be affected by intracellular ATP values (Van Blerkom *et al.*, 1995). As mentioned above, a slower cleavage rate of ATP-deprived embryos may be overlooked because of the limited number of observations made as well as the short-term culture period employed prior to embryo transferral or cryopreservation.

A decreased GSH/GSSG ratio may inhibit not only the synthesis of proteins, RNA and DNA but also the activation of maturation promoting factor (MPF) with the resulting block from ENTRY into the M-phase. This could be achieved by preventing dephosphorylation of the p34<sup>cdc2</sup> subunit of MPF via inhibition of the tyrosine phosphatase p80<sup>cdc25</sup>, as shown in mouse fibroblast cells treated with the oxidants  $\text{H}_2\text{O}_2$  (Sullivan *et al.*, 1994) and diamide (Monteiro *et al.*, 1991). This is supported by the fact that addition of superoxide dismutase, a scavenger of  $\text{O}_2^-$ , or thioredoxin, a potent protein disulphide reductase, to the culture medium of mouse embryos releases the 2-cell block to development and restores dephosphorylation of the p34cdc2 subunit of MPF at the M-phases of both the first and the second cleavage (Natsuyama *et al.*, 1993). Alternatively, MPF activation may be prevented through activation of proteolysis of the cytostatic factor p39<sup>mos</sup> by the calcium-dependent cysteine protease calpain (Watanabe *et al.*, 1989; see Orrenius *et al.*, 1992, for review, on involvement of  $\text{Ca}^{2+}$ -activated proteases in oxidant injury to cells). Paradoxically, prevention of MPF activation may catalyse the EXIT from the M-phase of aged oocytes either spontaneously or subsequent to activation by a spermatozoon at fertilization. Formation of a restitution nucleus in spontaneously activated oocytes (Szollosi, 1971; Eichenlaub-Ritter *et al.*, 1988b; Van Wissen *et al.*, 1991) and shortening of the duration of the first cell cycle in sperm-activated oocytes (Fraser, 1979; Boerjan

and de Boer, 1990) may be direct consequences of such an event. Likewise, maternal age-associated oxidative stress may alter the balance of phosphorylations and dephosphorylations of cell cycle-related proteins during the first meiotic division resulting in shortening of duration of prophase I. It is worth noting the fact that ROS may affect overall tyrosine phosphorylation not only by inhibiting tyrosine phosphatases (Monteiro *et al.*, 1991; Sullivan *et al.*, 1994) but also by stimulating tyrosine kinases (Chan *et al.*, 1986).

### Embryo morphology

The increased incidence of cellular fragmentation and gross abnormal morphology exhibited by embryos derived from aged oocytes may result from oxidative damage to cytoskeletal fibres. The age-associated reduction in GSH/GSSG ratio and the concomitant increase in cytosolic Ca<sup>2+</sup> concentration may be major factors causing morphological anomalies in embryos. Although based on few experiments, Van Blerkom *et al.* (1995) have shown that in humans ATP content is probably more patient-dependent than related to a specific embryo morphology. They have shown that the ATP concentration of embryos with numerous fragments from patients who conceive is in the 2.6–3.2 pmol range. In contrast, the ATP concentration of embryos with a similar extent of fragmentation from patients who fail to conceive is in the 0.9–1.4 pmol range. The lack of effect by ATP on embryo morphology may be explained by the insensitivity of the cytoplasmic microtubule network to intracellular ATP deprivation.

There is evidence supporting the concept that age-associated oxidative damage to cytoskeletal fibres may result in abnormal embryo morphology. In contrast to the surface of vital blastomeres, which is organized into short, regular microvilli, the surface of cellular fragments exhibits irregularly shaped blebs and protrusions (Alikani and Dale, 1995). Furthermore, in humans the majority of poor quality embryos are either aneuploid or have fragmented chromosomes (Pellestor *et al.*, 1994). As mentioned above, cytoskeletal alterations associated with formation of surface blebs are characteristic signals of oxidative cell injury. Moreover, it has been shown that a number of physical and chemical agents, that are directly or indirectly involved in intracellular free radical production and/or oxidative stress generation, including ionizing (X-rays or  $\gamma$ -rays) and non-ionizing (UV) radiation, quinones, heavy metal ions, anaesthetics, GSH-conjugating and GSH-oxidizing agents, carbamates, organo-mercurial agents, inducers of mixed-function oxidase reaction, cigarette smoke, methyl-xanthines and oestrogens, are potential inducers of aneuploidy (for reviews see Bond and Chandley, 1983; Onfelt, 1986; Tarín, 1995). Further, a sustained increase in intracellular Ca<sup>2+</sup> has been shown to promote endonuclease activation and high molecular weight DNA fragmentation in thymocyte apoptosis (Zhivotovsky *et al.*, 1994).

### Birth defects, childhood cancer and fertility of offspring

It is well known that paternal ageing leads to heritable mutations responsible for numerous malformations at birth

including the dominant conditions achondroplasia, Apert's syndrome, myositis ossificans and Marfan's syndrome, and the recessive condition haemophilia A. Childhood cancer in offspring including bilateral retinoblastoma also appears to be associated with paternal ageing (for reviews see Vogel and Rathenberg, 1975; Auroux, 1983; Ames *et al.*, 1993; Crow, 1993). In contrast, maternal ageing has either no, or much more limited, long-term effects on offspring. This fact is not unexpected if we take into account that, unlike spermatogonia, diplotene oocytes and to less extent metaphase I and II oocytes have an efficient DNA repair system which is essentially independent of maternal age (Guli and Smith, 1989). Thus, any damage to the nuclear DNA of the oocyte caused by either intrinsic (e.g. age-associated oxidative stress) or extrinsic (e.g. maternal exposure to ionizing and non-ionizing radiation or to other mutagenic agents) may be repaired before being transmitted to the offspring. Furthermore, oocytes exhibiting heavy oxidative damage to their intracellular components may be selected against at fertilization and so their traits would not be transmitted to future generations. However, a long-term deletion effect of maternal ageing upon male offspring infertility has been suggested by Cummins *et al.* (1994). The mechanism by which this effect may occur is based on the inheritance of excess loads of maternal defective mitochondria allocated randomly to testis-forming tissues, in particular to precursors of Sertoli and Leydig cells. Prophylactic measures for improving the reproductive function of middle-age women and so reducing the potential short-term (aneuploidy) and long-term (male infertility?) risks to offspring may be based on consumption of dietary antioxidants. However, it is necessary to bear in mind that such a preventive measure may be inefficient if started too late, i.e. at the peri-menopausal period, when extensive oxidative damage to oocytes may have already occurred.

### References

- Alikani, M. and Dale, B. (1995) Should fragmenting blastomeres stay together? *Alpha*, September, 1–2.
- Ames, B.N., Shigenaga, M.K. and Hagen, T.M. (1993) Oxidants, antioxidants, and the degenerative diseases of aging. *Proc. Natl. Acad. Sci. USA*, **90**, 7915–7922.
- Antinori, S., Versaci, C., Panci, C. *et al.* (1995) Fetal and maternal morbidity and mortality in menopausal women aged 45–63 years. *Hum. Reprod.*, **10**, 464–469.
- Ashkenazi, J., Feldberg, D., Dicker, D. *et al.* (1990) Reinsemination in human IVF with fresh versus initial semen: a comparative study. *Eur. J. Obstet. Gynecol. Reprod. Biol.*, **34**, 97–101.
- Auroux, M. (1983) Le vieillissement testiculaire et ses conséquences. *J. Gyn. Obst. Biol. Repr.*, **12**, 11–17.
- Badenas, J., Santaló, J., Calafell, J.M. *et al.* (1989) Effect of the degree of maturation of mouse oocytes at fertilization: a source of chromosome imbalance. *Gamete Res.*, **24**, 205–218.
- Ball, B.A., Little, T.V., Weber, J.A. and Woods, G.L. (1989) Survival of day-4 embryos from young, normal mares and aged, subfertile mares after transfer to normal recipient mares. *J. Reprod. Fertil.*, **85**, 187–194.
- Beatrice, M.C., Stiers, D.L. and Pfeiffer, D.R. (1984) The role of glutathione in the retention of Ca<sup>2+</sup> by liver mitochondria. *J. Biol. Chem.*, **259**, 1279–1287.
- Bedford, J.M., Calvin, H. and Cooper, G.W. (1973) The maturation of spermatozoa in the human epididymis. *J. Reprod. Fertil.*, **18** (Suppl.), 199–213.
- Ben-Rafael, Z., Kopf, G.S., Blasco, L. *et al.* (1986) Fertilization and cleavage after reinsemination of human oocytes *in vitro*. *Fertil. Steril.*, **45**, 58–62.

- Bergere, M., Selva, J., Dulouost, E. *et al.* (1992) Influence of male sexual rest and oocyte aging on parthenogenesis frequency in mice: cytogenetic analysis after *in vitro* fertilization. *Arch. Androl.*, **28**, 115–120.
- Berkowitz, S.A. and Wolff, J. (1981) Intrinsic calcium sensitivity of tubulin polymerization. *J. Biol. Chem.*, **10**, 11216–11223.
- Bershady, A.D. and Gelfand, V.I. (1983) Role of ATP in the regulation of stability of cytoskeletal structures. *Cell Biol. Int. Rep.*, **7**, 173–187.
- Bershady, A.D., Gelfand, V.I., Svitkina, T.M. and Tint, I.S. (1980) Destruction of microfilament bundles in mouse embryo fibroblasts treated with inhibitors of energy metabolism. *Exp. Cell Res.*, **127**, 421–429.
- Boerjan, M.L. and de Boer, P. (1990) First cell cycle of zygotes of the mouse derived from oocytes aged postovulation *in vivo* and fertilized *in vivo*. *Mol. Reprod. Dev.*, **25**, 155–163.
- Boerjan, M.L. and Saris, L.A. (1991) The effects of spermatozoal irradiation with X-rays on chromosome abnormalities and on development of mouse zygotes after delayed fertilization. *Mutat. Res.*, **256**, 49–57.
- Bond, D.J. and Chandley, A.C. (1983) Aneuploidy. In Fraser Roberts, J.A., Carter, C.O. and Motulsky, A.G. (eds), *Oxford Monographs on Medical Genetics*. No. 11. Oxford University Press, Oxford, 198 pp.
- Brinsko, S.P., Ball, B.A., Miller, P.G. *et al.* (1994) *In vitro* development of day 2 embryos obtained from young, fertile mares and aged, subfertile mares. *J. Reprod. Fertil.*, **102**, 371–378.
- Calvin, H.I., Grosshans, K. and Blake, E. (1986) Estimation and manipulation of glutathione levels in prepubertal mouse ovaries and ova: relevance of sperm nucleus transformations in the fertilized egg. *Gamete Res.*, **14**, 265–275.
- Carroll, A.G. and Longo, F.J. (1981) Effects of postovulatory aging on leucine uptake and incorporation in mouse eggs. A brief note. *Mech. Aging Dev.*, **17**, 361–367.
- Catalá, V., Estop, A.M., Santaló, J. and Egozcue, J. (1988) Sexual immaturity and maternal age: incidence of aneuploidy and polyploidy in first-cleavage mouse embryos. *Cytogenet. Cell Genet.*, **48**, 233–237.
- Chan, T.M., Chen, E., Tatoyan, A. *et al.* (1986) Stimulation of tyrosine-specific protein phosphorylation in the rat liver plasma membrane by oxygen radicals. *Biochem. Biophys. Res. Commun.*, **139**, 439–445.
- Chen, H.L., Copperman, A.B., Grunfeld, L. *et al.* (1995) Failed fertilization *in vitro*. second day micromanipulation of oocytes versus reinsemination. *Fertil. Steril.*, **63**, 1337–1340.
- Choe, M., Jackson, C. and Yu, B.P. (1995) Lipid peroxidation contributes to age-related membrane rigidity. *Free Radic. Biol. Med.*, **18**, 977–984.
- Cohen, J., Alikani, M., Trowbridge, J. and Rosenwaks, Z. (1992) Implantation enhancement by selective assisted hatching using zona drilling of human embryos with poor prognosis. *Hum. Reprod.*, **7**, 685–691.
- Crow, J.F. (1993) How much do we know about spontaneous human mutation rates? *Environ. Mol. Mutagen.*, **21**, 122–129.
- Cummins, J.M., Jequier, A.M. and Kan, R. (1994) Molecular biology of human male infertility: links with aging, mitochondrial genetics, and oxidative stress? *Mol. Reprod. Dev.*, **37**, 345–362.
- Day, J.R., Lapolt, P.S. and Lu, J.K.H. (1991) Plasma patterns of prolactin, progesterone, and estradiol during early pregnancy in aging rats: relation to embryonic development. *Biol. Reprod.*, **44**, 786–790.
- Day, J.R., LaPolt, P.S., Morales, T.H. and Lu, J.K.H. (1989) An abnormal pattern of embryonic development during early pregnancy in aging rats. *Biol. Reprod.*, **41**, 933–939.
- Dodson, M.G., Minhas, B.S., Curtis, S.K. *et al.* (1989) Spontaneous zona reaction in the mouse as a limiting factor for the time in which an oocyte may be fertilized. *J. In Vitro Fertil. Embryo Transfer*, **6**, 101–106.
- Ducibella, T., Duffy, P., Reindollar, R. and Su, B. (1990) Changes in the distribution of mouse cortical granules and ability to undergo the cortical reaction during gonadotropin-stimulated meiotic maturation and aging *in vivo*. *Biol. Reprod.*, **43**, 870–876.
- Eichenlaub-Ritter, U. and Boll, I. (1989) Nocodazole sensitivity, age-related aneuploidy, and alterations in the cell cycle during maturation of mouse oocytes. *Cytogenet. Cell Genet.*, **52**, 170–176.
- Eichenlaub-Ritter, U., Chandley, A.C. and Gosden, R.G. (1988a) The CBA mouse as a model for age-related aneuploidy in man: studies of oocyte maturation, spindle formation and chromosome alignment during meiosis. *Chromosoma*, **96**, 220–226.
- Eichenlaub-Ritter, U., Stahl, A. and Luciani, J.M. (1988b) The microtubular cytoskeleton and chromosomes of unfertilized human oocytes aged *in vitro*. *Hum. Genet.*, **80**, 259–264.
- Edirisinghe, W.R., Law, H.Y., Ng, S.C. *et al.* (1986) Superovulation of mice with human menopausal gonadotropin or pure follicle-stimulating hormone in combination with human chorionic gonadotropin and the effects of oocyte aging on *in vitro* fertilization. *J. In Vitro Fertil. Embryo Transfer*, **3**, 314–318.
- Eppig, J.J. and O'Brien, M. (1995) *In vitro* maturation and fertilization of oocytes isolated from aged mice: a strategy to rescue valuable genetic resources. *J. Assist. Reprod. Genet.*, **12**, 269–273.
- Estop, A. (1989) Non disjunction and maternal age in the mouse. *Prog. Clin. Biol. Res.*, **311**, 221–244.
- Feldberg, D., Farhi, J., Dicker, D. *et al.* (1990) The impact of embryo quality on pregnancy outcome in elderly women undergoing *in vitro* fertilization-embryo transfer (IVF-ET). *J. In Vitro Fertil. Embryo Transfer*, **7**, 257–261.
- Fraser, L.R. (1979) Rate of fertilization *in vitro* and subsequent nuclear development as a function of the post-ovulatory age of the mouse egg. *J. Reprod. Fertil.*, **55**, 153–160.
- Fukuda, A., Roudebush, W.E. and Thatcher, S.S. (1992) Influences of *in vitro* oocyte aging on microfertilization in the mouse with reference to zona hardening. *J. Assist. Reprod. Genet.*, **9**, 378–383.
- Gallicano, G.I., Larabell, C.A., McGaughey, R.W. and Capco, D.G. (1994) Novel cytoskeletal elements in mammalian eggs are composed of a unique arrangement of intermediate filaments. *Mech. Dev.*, **45**, 211–226.
- Gianfortoni, J.G. and Gulyas, B.J. (1985) The effects of short-term incubation (aging) of mouse oocytes on *in vitro* fertilization, zona solubility, and embryonic development. *Gamete Res.*, **11**, 59–68.
- Golbus, M.S. and Stein, M.P. (1976) Qualitative patterns of protein synthesis in the mouse oocyte. *J. Exp. Zool.*, **198**, 337–342.
- Guli, C.L. and Smyth, D.R. (1989) Lack of effect of maternal age on UV-induced DNA repair in mouse oocytes. *Mutat. Res.*, **210**, 323–328.
- Gulyas, B.J. (1980) Cortical granules of mammalian eggs. *Int. Rev. Cytol.*, **63**, 357–392.
- Harman, D. (1956) Aging: a theory based on free radical and radiation chemistry. *J. Gerontol.*, **11**, 298–300.
- Hinshaw, D.B., Burger, J.M., Beals, T.F. and Armstrong, B.C. (1991) Actin polymerization in cellular oxidant injury. *Arch. Biochem. Biophys.*, **288**, 311–316.
- Hinshaw, D.B., Burger, J.M., Miller, M.T. *et al.* (1993) ATP depletion induces an increase in the assembly of a labile pool of polymerized actin in endothelial cells. *Am. J. Physiol.*, **264**, C1171–C1179.
- Hori, M., Sato, H., Kitakaze, M. *et al.* (1993)  $\beta$ -Adrenergic stimulation disassembles microtubules in neonatal rat cultured cardiomyocytes through intracellular  $Ca^{2+}$  overload. *Circ. Res.*, **75**, 324–334.
- Imoedemhe, D.A.G. and Sigue, A.B. (1994) The influence of subzonal microinsemination of oocytes failing to fertilize in scheduled routine *in vitro* fertilization cycles. *Hum. Reprod.*, **9**, 669–672.
- Keefe, D.L., Niven-Fairchild, T., Powell, S. and Buradagunta, S. (1995) Mitochondrial deoxyribonucleic acid deletions in oocytes and reproductive ageing in women. *Fertil. Steril.*, **64**, 577–583.
- Keith, C., DiPaola, M., Maxfield, F.R. and Shelanski, M.L. (1983) Microinjection of  $Ca^{++}$ -calmodulin causes a localized depolymerization of microtubules. *J. Cell Biol.*, **97**, 1918–1924.
- Kiehart, D.P. (1981) Studies on the *in vivo* sensitivity of spindle microtubules to calcium ions and evidence for a vesicular calcium-sequestering system. *J. Cell Biol.*, **88**, 604–617.
- Kirschner, M.W. and Williams, R.C. (1974) The mechanism of microtubule assembly *in vitro*. *J. Supramol. Struct.*, **2**, 412–428.
- Kosower, N.S. and Kosower, E.M. (1978) The glutathione status of cells. *Int. Rev. Cytol.*, **54**, 109–160.
- Lanman, J.T. (1968) Delays during reproduction and their effects on the embryo and fetus. 2. Aging of eggs. *N. Engl. J. Med.*, **278**, 1047–1054.
- Lee, V.H. and Dunbar, B.S. (1993) Developmental expression of the rabbit 55-kDa zona pellucida protein and messenger RNA in ovarian follicles. *Dev. Biol.*, **155**, 371–382.
- Longo, F.J. (1974) Ultrastructural changes in rabbit eggs aged *in vivo*. *Biol. Reprod.*, **11**, 22–39.
- Longo, F.J. (1980) Aging of mouse eggs *in vivo* and *in vitro*. *Gamete Res.*, **3**, 379–393.
- Longo, F.J. (1981) Changes in the zonae pellucidae and plasmalemmae of aging mouse eggs. *Biol. Reprod.*, **25**, 399–411.
- Malinger, G., Zakut, H. and Soreq, H. (1989) Cholinergic properties of human primordial, preantral, and antral oocytes: *in situ* hybridization and biochemical evidence for expression of cholinesterase genes. *J. Mol. Neurosci.*, **1**, 77–84.
- Matt, D.W., Sarver, P.L. and Lu, J.K.H. (1987) Relation of parity and estrous cyclicity to the biology of pregnancy in aging female rats. *Biol. Reprod.*, **37**, 421–430.

- Medvedev, Z.A. (1990) An attempt at a rational classification of theories of ageing. *Biol. Rev.*, **65**, 375–398.
- Meldrum, D.R. (1993) Female reproductive aging—ovarian and uterine factors. *Fertil. Steril.*, **59**, 1–5.
- Miquel, J. and Fleming, J. (1986) Theoretical and experimental support for an 'oxygen radical-mitochondrial injury' hypothesis of cell aging. In Johnson, J.E., Walford, R., Harman, D. and Miquel, J. (eds), *Free Radicals, Aging, and Degenerative Diseases*. Alan R. Liss Inc., New York, pp. 51–74.
- Miquel, J., Lundgren, P.R. and Johnson, J.E. Jr. (1978) Spectrophotofluorometric and electron microscopic study of lipofuscin accumulation in the testis of aging mice. *J. Gerontol.*, **33**, 5–19.
- Miquel, J., Economos, A.C., Fleming, J. and Johnson, J.E. Jr. (1980) Mitochondrial role in cell aging. *Exp. Gerontol.*, **15**, 575–591.
- Monteiro, H.P., Ivaschenko, Y., Fisher, R. and Stern, A. (1991) Inhibition of protein tyrosine phosphatase activity by diamide is reversed by epidermal growth factor in fibroblasts. *FEBS Lett.*, **295**, 146–148.
- Munné, S., Alikani, M., Tomkin, G. *et al.* (1995) Embryo morphology, developmental rates, and maternal age are correlated with chromosome abnormalities. *Fertil. Steril.*, **64**, 382–391.
- Nagy, Z.P., Joris, H., Liu, J. *et al.* (1993) Intracytoplasmic single sperm injection of 1-day-old unfertilized human oocytes. *Hum. Reprod.*, **8**, 2180–2184.
- Natsuyama, S., Noda, Y., Yamashita, M. *et al.* (1993) Superoxide dismutase and thioredoxin restore defective p34cdc2 kinase activation in mouse two-cell block. *Biochem. Biophys. Acta*, **1176**, 90–94.
- Nogués, C., Ponsá, M., Vidal, F. *et al.* (1988) Effects of aging on the zona pellucida surface of mouse oocytes. *J. In Vitro Fertil. Embryo Transfer*, **5**, 225–229.
- Onfelt, A. (1986) Mechanistic aspects on chemical induction of spindle disturbances and abnormal chromosome numbers. *Mutat. Res.*, **168**, 249–300.
- O'Neill, G.T. and Kaufman, M.H. (1988) Influence of postovulatory aging on chromosome segregation during the second meiotic division in mouse oocytes: a parthenogenetic analysis. *J. Exp. Zool.*, **248**, 125–131.
- Orrenius, S., Burkitt, M.J., Kass, G.E.N. *et al.* (1992) Calcium ions and oxidative cell injury. *Ann. Neurol.*, **32**, S33–S42.
- Page, R.D., Kirkpatrick-Keller, D. and Butcher, R.L. (1983) Role of age and length of oestrous cycle in alteration of the oocyte and intrauterine environment in the rat. *J. Reprod. Fertil.*, **69**, 23–28.
- Parkening, T.A. and Soderwall, A.L. (1973) Preimplantation stages from young and senescent golden hamsters: presence of succinic dehydrogenase and non-viable ova. *J. Reprod. Fertil.*, **35**, 373–376.
- Parkening, T.A. and Chang, M.C. (1976) In-vitro fertilization of ova from senescent mice and hamsters. *J. Reprod. Fertil.*, **48**, 381–383.
- Pellestor, F., Giraudet, A., Andréo, B. *et al.* (1994) Relationship between morphology and chromosomal constitution in human preimplantation embryo. *Mol. Reprod. Dev.*, **39**, 141–146.
- Peluso, J.J., England-Charlesworth, C. and Hutz, R. (1980) Effect of age and of follicular aging on the preovulatory oocyte. *Biol. Reprod.*, **22**, 999–1005.
- Perreault, S.D., Wolff, R.A. and Zirkin, B.R. (1984) The role of disulfide bond reduction during mammalian sperm nuclear decondensation *in vivo*. *Dev. Biol.*, **101**, 160–167.
- Pickering, S.J., Johnson, M.H., Braude, P.R. and Houlston, E. (1988) Cytoskeletal organization in fresh, aged and spontaneously activated human oocytes. *Hum. Reprod.*, **3**, 978–989.
- Plachot, M., Veiga, A., Montagut, J. *et al.* (1988) Are clinical and biological IVF parameters correlated with chromosomal disorders in early life: a multicentric study. *Hum. Reprod.*, **3**, 627–635.
- Pool, T.B., Martin, J.E., Ellsworth, L.R. *et al.* (1990) Zygote intrafallopian transfer with 'donor rescue': a new option for severe male factor infertility. *Fertil. Steril.*, **54**, 166–168.
- Quinn, P. and Wales, R.G. (1973) The relationships between the ATP content of preimplantation mouse embryos and their development *in vitro* during culture. *J. Reprod. Fertil.*, **35**, 301–309.
- Reyes, A., Mercado, F., Goicoches, F. and Rosado, A. (1976) Participation of membrane sulfhydryl groups in the epididymal maturation of human and rabbit spermatozoa. *Fertil. Steril.*, **27**, 1452–1458.
- Roberts, C.G. and O'Neill, C.O. (1995) Increase in the rate of diploidy with maternal age in unfertilized in-vitro fertilization oocytes. *Hum. Reprod.*, **10**, 2139–2141.
- Rokutan, K., Johnston, R.B. and Kawai, K. (1994) Oxidative stress induces S-thiolation of specific proteins in cultured gastric mucosal cells. *Am. J. Physiol.*, **266**, G247–G254.
- Shalgi, R., Seligman, J. and Kosower, N.S. (1989) Dynamics of the thiol status of rat spermatozoa during maturation: analysis with the fluorescent labeling agent monobromobimane. *Biol. Reprod.*, **40**, 1037–1045.
- Sharma, V., Riddle, A., Mason, B.A. *et al.* (1988) An analysis of factors influencing the establishment of a clinical pregnancy in an ultrasound-based ambulatory *in vitro* fertilization program. *Fertil. Steril.*, **49**, 468–478.
- Shigenaga, M.K., Hagen, T.M. and Ames, B.N. (1994) Oxidative damage and mitochondrial decay in aging. *Proc. Natl. Acad. Sci. USA*, **91**, 10771–10778.
- Schliwa, M., Euteneuer, U., Bulinski, J.C. and Izant, J.G. (1981) Calcium lability of cytoplasmic microtubules and its modulation by microtubule-associated proteins. *Proc. Natl. Acad. Sci. USA*, **78**, 1037–1041.
- Singh, B., Rutledge, J.M. and Armstrong, D.T. (1995) Epidermal growth factor and its receptor gene expression and peptide location in porcine ovarian follicles. *Mol. Reprod. Dev.*, **40**, 391–399.
- Smith, A.L. and Lodge, J.R. (1987) Interactions of aged gametes: *in vitro* fertilization using *in vitro*-aged sperm and *in vivo*-aged ova in the mouse. *Gamete Res.*, **16**, 47–56.
- Stein, A., Rufas, O., Amit, S. *et al.* (1995) Assisted hatching by partial zona dissection of human pre-embryos in patients with recurrent implantation failure after *in vitro* fertilization. *Fertil. Steril.*, **63**, 838–841.
- Sullivan, S.G., Chiu, D.T.Y., Errasfa, M. *et al.* (1994) Effects of H<sub>2</sub>O<sub>2</sub> on protein tyrosine phosphatase activity in HER14 cells. *Free Rad. Biol. Med.*, **16**, 399–403.
- Sundstrom, P., Nilsson, B.O., Liedholm, P. and Larsson, E. (1985) Ultrastructural characteristics of human oocytes fixed at follicular puncture or after culture. *J. In Vitro Fertil. Embryo Transfer*, **2**, 195–206.
- Svitkina, T.M., Neyfakh, A.A. and Bershadsky, A.D. (1986) Actin cytoskeleton of spread fibroblast appears to assemble at the cell edges. *J. Cell Sci.*, **82**, 235–248.
- Szollosi, D. (1971) Morphological changes in mouse eggs due to aging in the Fallopian tube. *Am. J. Anat.*, **130**, 209–226.
- Tait, J. and Frieden, C. (1982) Chemical modification of actin. Acceleration of polymerization and reduction of network formation by reaction with *N*-ethylmaleimide, (iodoacetamido)tetramethylrhodamine, or 7-chloro-4-nitro-2,1,3-benzoxadiazole. *Biochemistry*, **21**, 6046–6053.
- Tarín, J.J. (1995) Aetiology of age-associated aneuploidy: a mechanism based on the 'free radical theory of ageing'. *Mol. Hum. Reprod.*, **1**, *Hum. Reprod.*, **10**, 1563–1565.
- Tarín, J.J., Sampaio, M., Serra, V. *et al.* (1990) Edad y tasa de anomalías cromosómicas en ovocitos humanos. *Obstet. Ginec. Españ.*, **0**, 78–92.
- Tesarik, J. (1989) The potential diagnostic use of human zona-free eggs prepared from oocytes that failed to fertilize *in vitro*. *Fertil. Steril.*, **52**, 821–824.
- Tesarik, J. (1993) Subzonal sperm insertion with aged human oocytes from failed *in vitro* fertilization attempts: fertilization results and some applications. *Hum. Reprod.*, **8**, 1245–1250.
- Tsirigotis, M., Nicholson, N., Taranissi, M. *et al.* (1995) Late intracytoplasmic sperm injection and unexpected failed fertilization *in vitro*: diagnostic or therapeutic? *Fertil. Steril.*, **63**, 816–819.
- Van Blerkom, J. (1979) Molecular differentiation of the rabbit ovum. III. Fertilization-autonomous polypeptide synthesis. *Dev. Biol.*, **72**, 188–194.
- Van Blerkom, J., Davis, P.W. and Lee, J. (1995) ATP content of human oocytes and developmental potential and outcome after *in vitro* fertilization and embryo transfer. *Hum. Reprod.*, **10**, 415–424.
- Van Wissen, B., Bomsel-Helmreich, O., Debey, P. *et al.* (1991) Fertilization and ageing processes in non-divided human oocytes after GnRH $\alpha$  treatment: An analysis of individual oocytes. *Hum. Reprod.*, **6**, 879–884.
- Vogel, F. and Rathenberg, R. (1975) Spontaneous mutation in man. *Adv. Hum. Genet.*, **5**, 223–318.
- Vom Saal, F.S., Finch, C.E. and Nelson, J.F. (1994) Natural history and mechanisms of reproductive aging in humans, laboratory rodents, and other selected vertebrates. In Knobil, E. and Neill, J.D. (eds), *The Physiology of Reproduction*. Raven Press Ltd., New York, pp.1213–1314.
- Watanabe, N., Vande Woude, G.F., Ikawa, Y. and Sagata, N. (1989) Specific proteolysis of the c-mos proto-oncogene product by calpain on fertilization of *Xenopus* eggs. *Nature*, **342**, 505–511.
- Webb, M., Howlett, S.K. and Maro, B. (1986) Parthenogenesis and cytoskeletal organization in aging mouse eggs. *J. Embryol. Exp. Morphol.*, **95**, 131–145.
- Wiker, S.R., Tucker, M.J., Wright, G. *et al.* (1993) Repeated sperm injection under the zona following initial fertilization failure. *Hum. Reprod.*, **8**, 467–469.
- Winston, N.J., Braude, P.R. and Johnson, M.H. (1993) Are failed-fertilized human oocytes useful? *Hum. Reprod.*, **8**, 503–507.

- Yanagimachi, R. (1994) Mammalian fertilization. In Knobil, E. and Neill, J.D. (eds), *The Physiology of Reproduction*. 2nd edn. Raven Press Ltd., New York, pp. 189–317.
- Yanagimachi, R., Huang, T.T.F., Fleming, A.D. *et al.* (1983) Dithiothreitol, a disulfide-reducing agent, inhibits capacitation, acrosome reaction, and interaction with eggs by guinea pig spermatozoa. *Gamete Res.*, **7**, 145–154.
- Yaron, Y., Botchan, A., Amit, A. *et al.* (1993) Endometrial receptivity: the age-related decline in pregnancy rates and the effect of ovarian function. *Fertil. Steril.*, **60**, 314–318.
- Yaron, Y., Botchan, A., Amit, A. *et al.* (1994) Endometrial receptivity in the light of modern assisted reproductive technologies. *Fertil Steril*, **62**, 225–232.
- Yie, S.-M., Collins, J.A., Daya, S. *et al.* (1996) Polyploidy and failed fertilization in in-vitro fertilization are related to patient's age and gamete quality. *Hum Reprod.*, **11**, 614–617.
- Zackowski, J.L. and Martin-Deleon, P.A. (1988) Second meiotic nondisjunction is not increased in postovulatory aged murine oocytes fertilized *in vitro*. *In Vitro Cell. Dev. Biol.*, **24**, 133–137.
- Zenzes, M.T. and Casper, R.F. (1992) Cytogenetics of human oocytes, zygotes, and embryos after *in vitro* fertilization. *Hum. Genet.*, **88**, 367–375.
- Zhivotovsky, B., Cedervall, B., Jiang, S. *et al.* (1994) Involvement of Ca<sup>2+</sup> in the formation of high molecular weight DNA fragments in thymocyte apoptosis. *Biochem. Biophys. Res. Commun.*, **202**, 120–127.

Received on October 31, 1995, accepted on August 15, 1996
